# Supplementary material
Source: Springer Nature journal article supplement (https://www.springermedizin.de/resource/supplementary/12955_2013_1107_MOESM1_ESM.pdf/9559288)

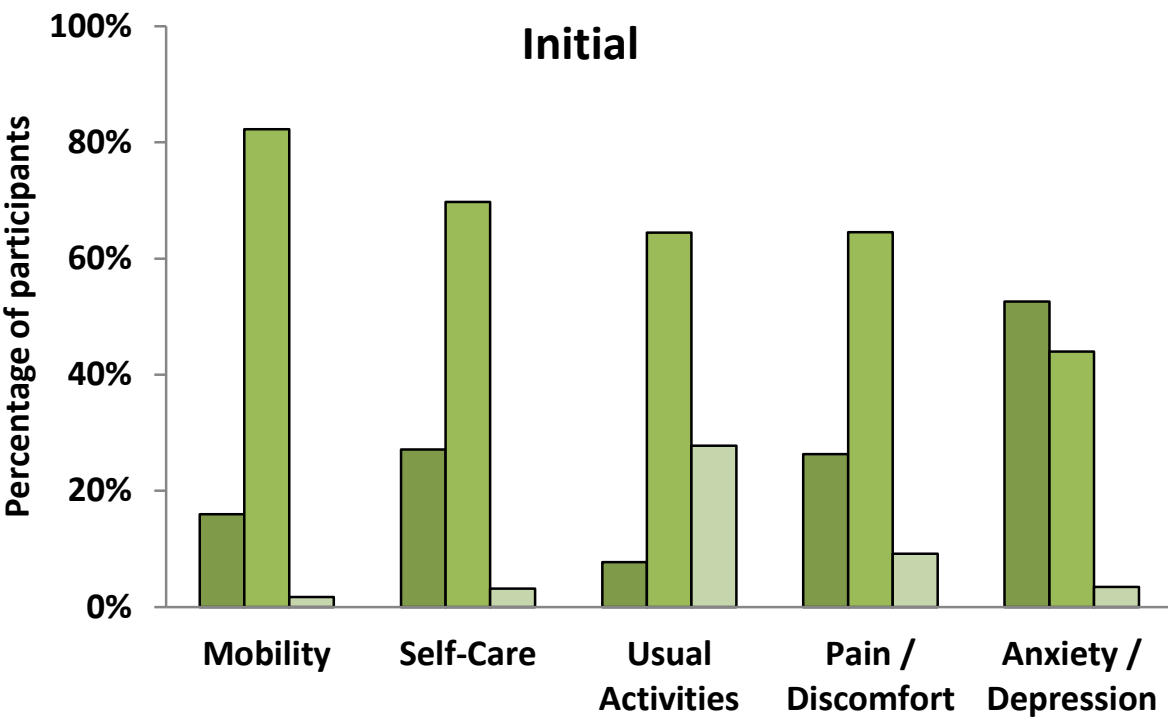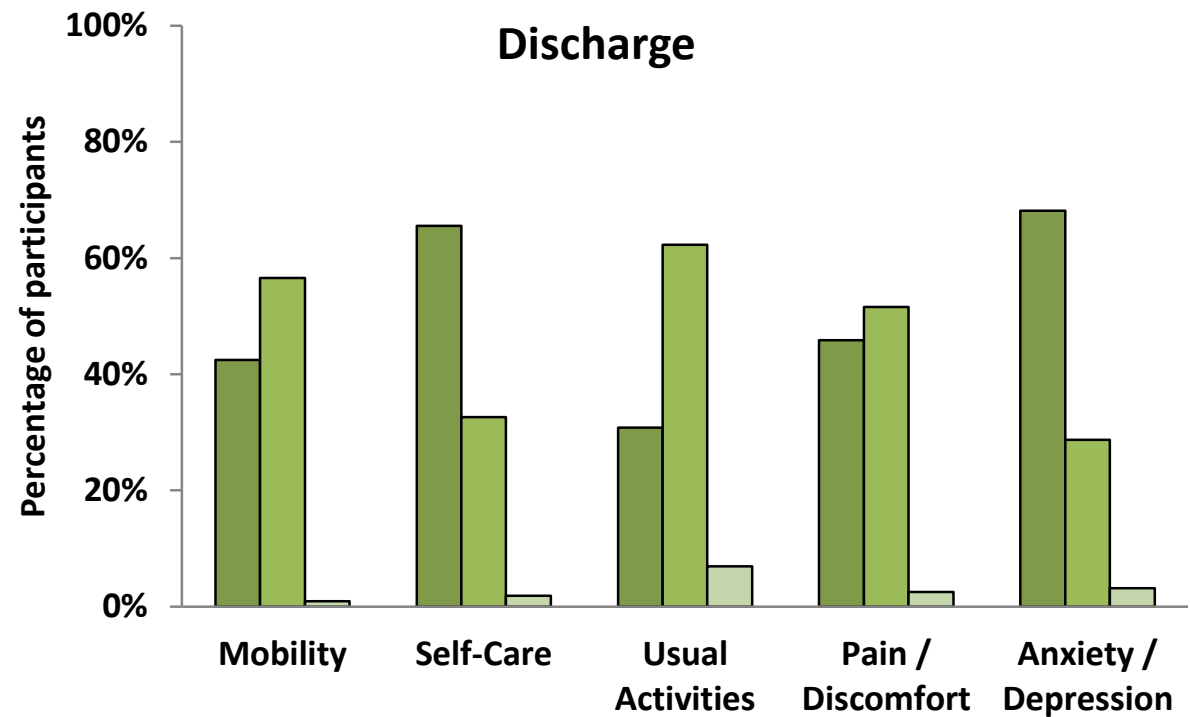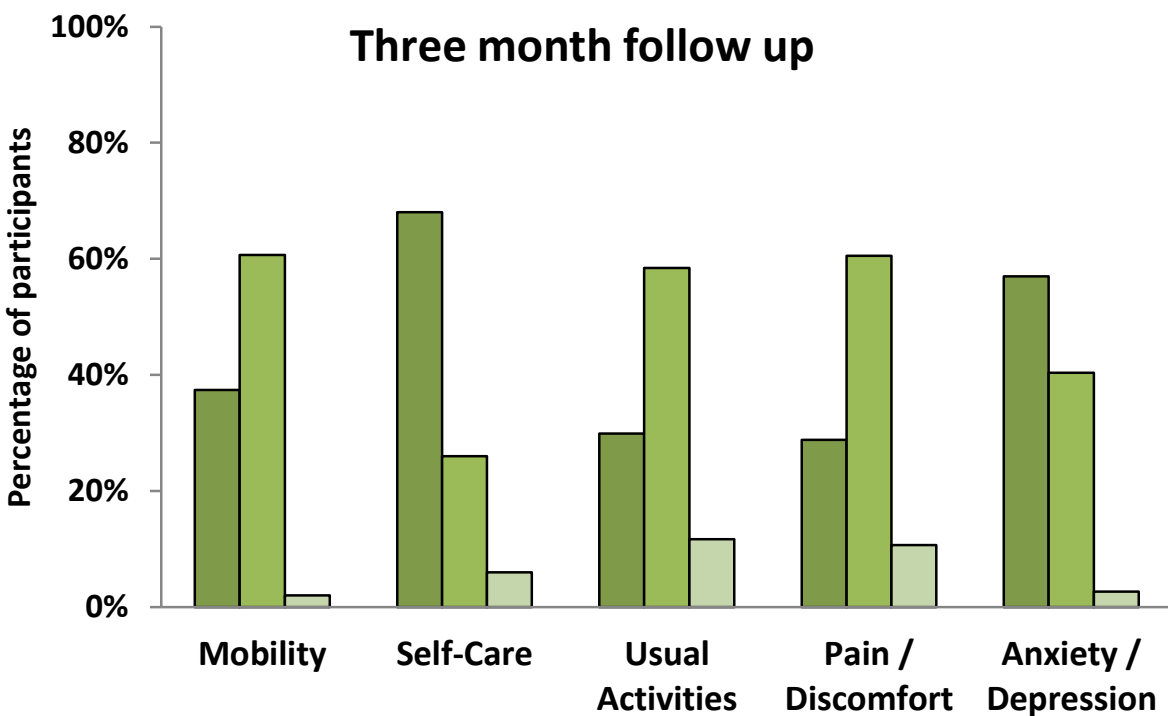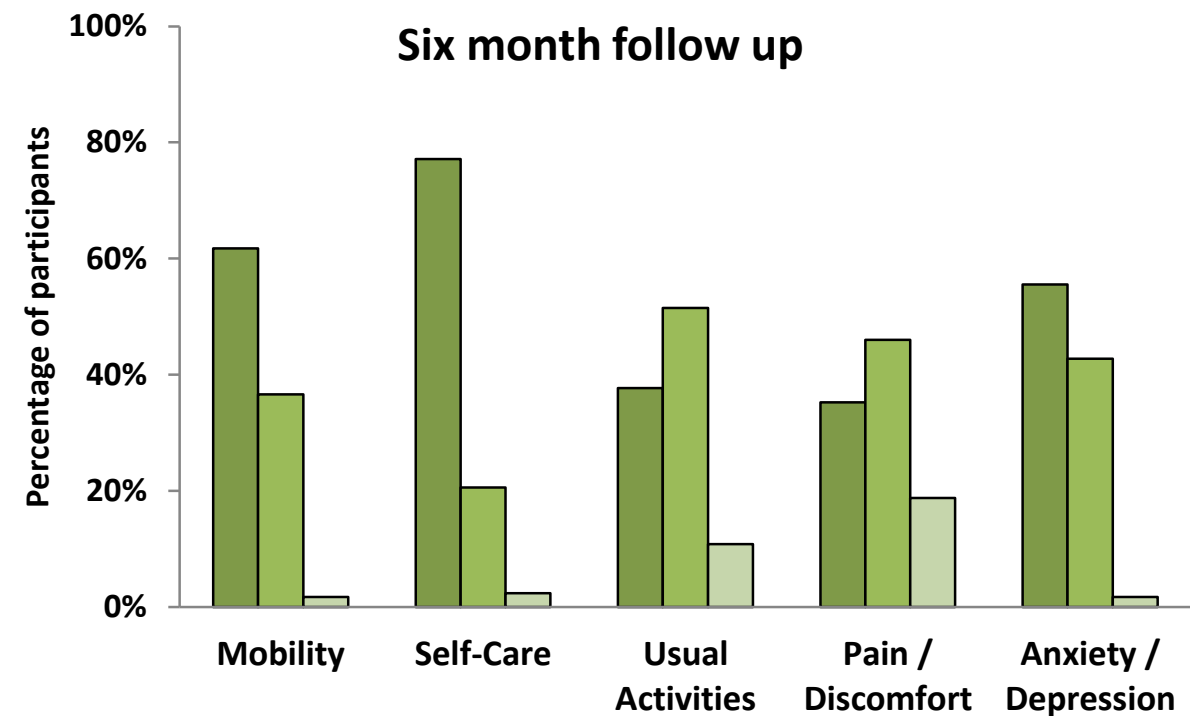

■ No problems
 ■ Some problems / moderate
 ■ Unable / extreme

Supplement: MOESM1 [file 9559288]
